# Supplementary material for: Excellent photocatalytic degradation and disinfection performance of a novel bifunctional Ag@AgSCN nanostructure with exposed {−112} facets
Source: Royal Society of Chemistry journal article supplement (doi:10.1039/c8nj01807c), 2018-01-01
Supplement: c8nj01807c1.pdf [file c8nj01807c1.pdf]

**Excellent photocatalytic degradation and disinfection performance of a novel  
bifunctional Ag@AgSCN nanostructure with exposed {-112} facets**

Xinfu Zhao\*<sup>a</sup>, Xibin Yi<sup>a</sup>, Shuo Tian<sup>c</sup>, Jian Zhang\*<sup>b</sup>

<sup>a</sup> Shandong provincial key laboratory for special silicone-containing materials, Advanced materials institute, QiLu University of Technology (Shandong Academy of Sciences), Jinan 250100, P. R. China.

<sup>b</sup> Department of chemistry and chemical engineering, Jining University, Qufu 273100, P. R. China.

<sup>c</sup> Animal Husbandry and Veterinary Bureau of Jinan, Jinan 250002, PR China

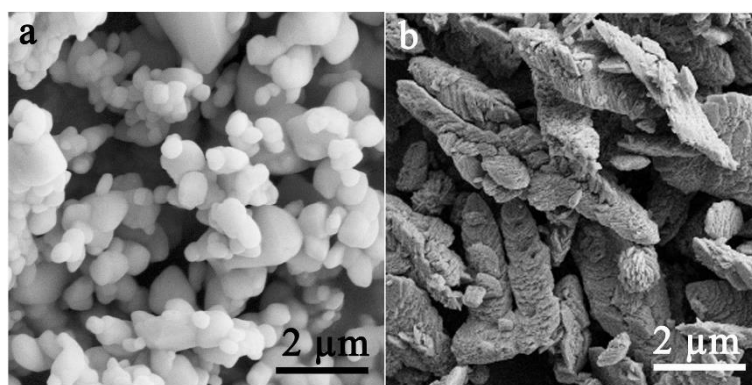

Fig.S1 SEM images of (a) Sample-1 and (b) leaf-shaped structure of Ag@AgSCN

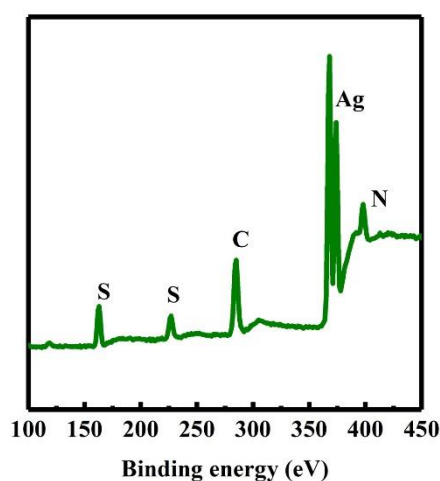

Fig.S2 full-range XPS spectrum of Ag@AgSCN

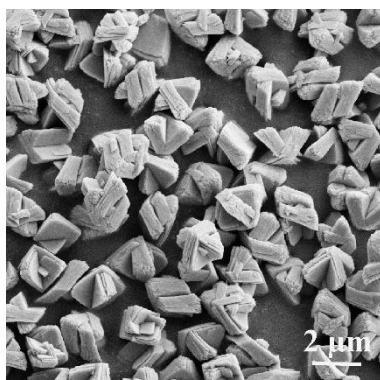

Fig.S3 SEM image of pure AgSCN.

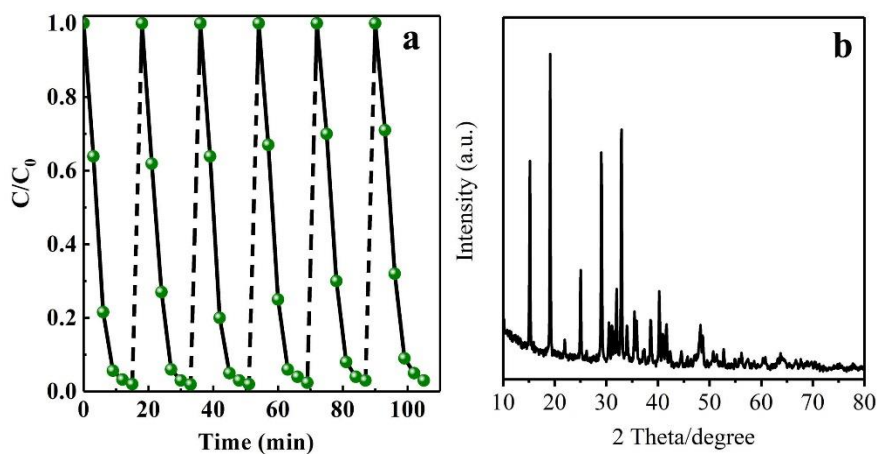

Fig.S4 (a) cycling degradation experiments of Sample-2 and (b) XRD patterns of Sample-2 after degradation

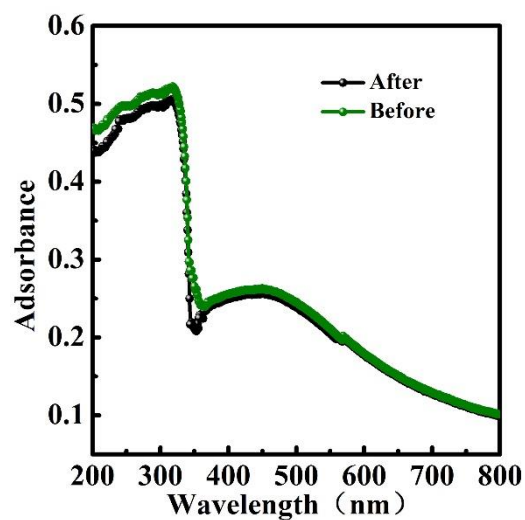

Fig.S5 Absorption spectra of Ag@AgSCN before and after six cycles

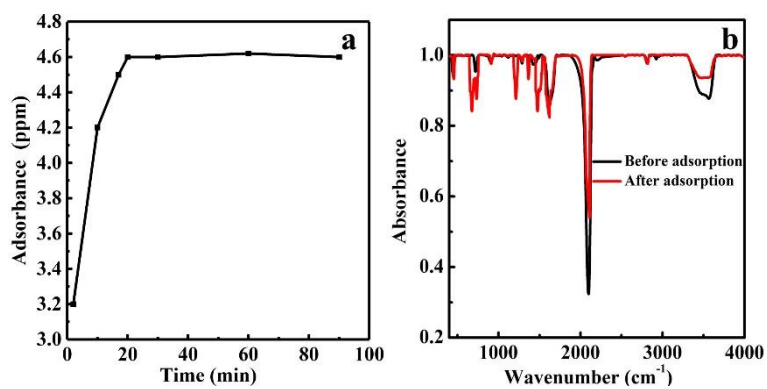

Fig.S6 (a) Adsorption plot of Ag@AgSCN adsorption on phenol, (b) FT-IR spectra of Ag@AgSCN before and after adsorption

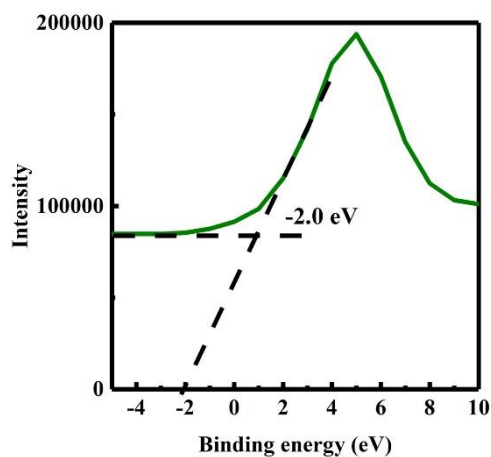

Fig.S7 XPS spectrum of AgSCN

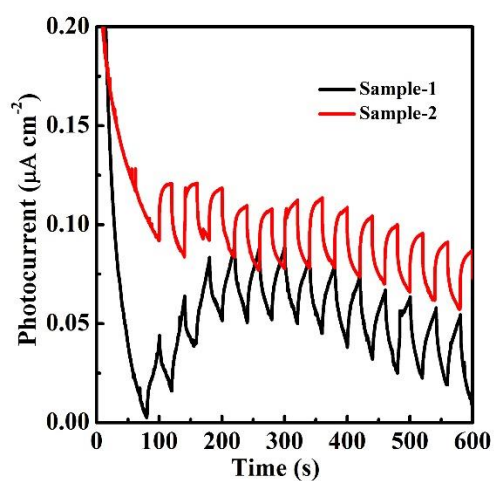

Fig. S8 Photocurrent plots of Sample-1 and Sample-2

Table S1 elements content of Sample-2 and Sample-3

| Sample   | Ag@AgSCN<br>(mg) | S content<br>(wt%) | $n_{\text{AgSCN}} \times 10^5$ | $n_{\text{Ag}} \times 10^7$ | $n_{\text{Ag}} : n_{\text{AgSCN}}$ |
|----------|------------------|--------------------|--------------------------------|-----------------------------|------------------------------------|
| Sample-2 | 2.130            | 18.717             | 1.245                          | 5.730                       | 0.0460                             |
| Sample-3 | 2.033            | 18.712             | 1.188                          | 5.518                       | 0.0464                             |

Table S2 parameters of dynamic model ( $R^2$ ,  $k$ ,  $\alpha$  and  $\beta$  respect for coefficient of correlation, rate constant, Elovich initial adsorption rate and desorption constant, respectively.)

|          | Lagergren<br>first-order<br>kinetic model | Lagergren<br>second-order<br>kinetic model | Elovich<br>equation | Internal<br>diffusion<br>model |
|----------|-------------------------------------------|--------------------------------------------|---------------------|--------------------------------|
| $R^2$    | 0.93                                      | 0.99                                       | 0.84                | 0.51                           |
| $k$      | 4.10                                      | 0.09                                       |                     | 0.19                           |
| $\alpha$ |                                           |                                            | 39.73               |                                |
| $\beta$  |                                           |                                            | 1.70                |                                |

Table S3 the rate constants ( $k$ ) and regression coefficients ( $R^2$ ) of Sample-2 in an aqueous solution saturated with different atmosphere

| <i>Atmosphere</i>    | <i>k (min<sup>-1</sup>)</i> | <i>R<sup>2</sup></i> |
|----------------------|-----------------------------|----------------------|
| <b>N<sub>2</sub></b> | 0.24                        | 0.98                 |
| <b>O<sub>2</sub></b> | 0.43                        | 0.95                 |
